# Supplementary figures and images for: Unexpected Diversity during Community Succession in the Apple Flower Microbiome
Source: PubMed Central journal article supplement — mBio. 2013 Feb 26;4(2):e00602-12. doi: 10.1128/mBio.00602-12 (PMC3585449; doi:10.1128/mbio.00602-12), 2013-02-26

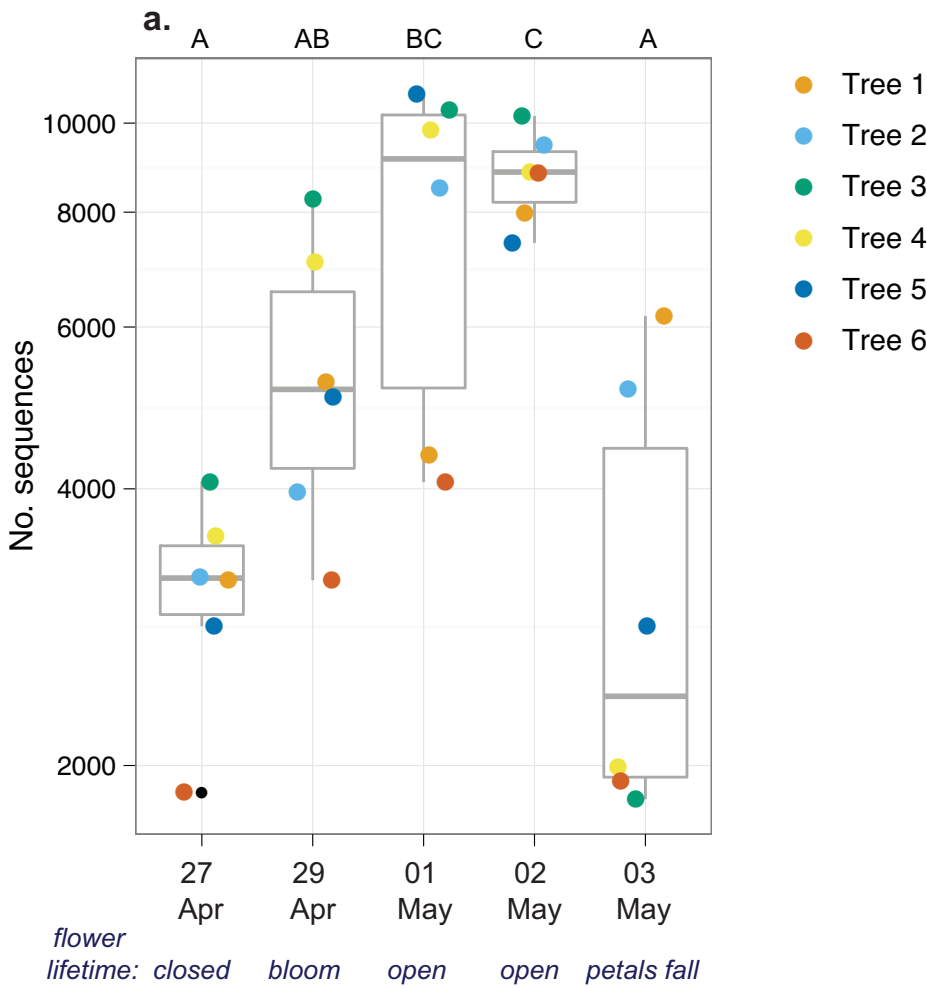

Supplement: mbo001131449sf02.pdf [file mbo001131449sf02.pdf]

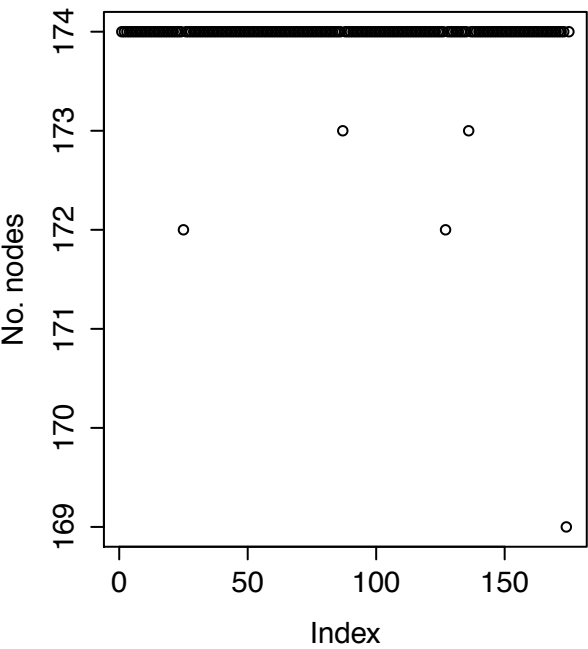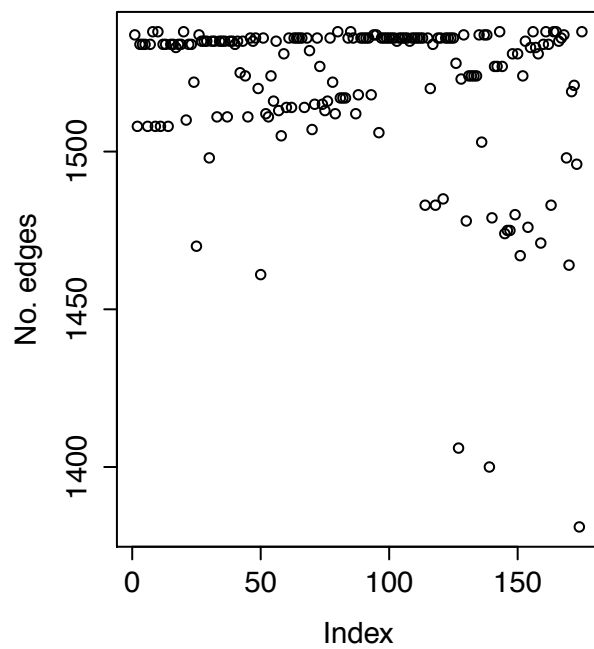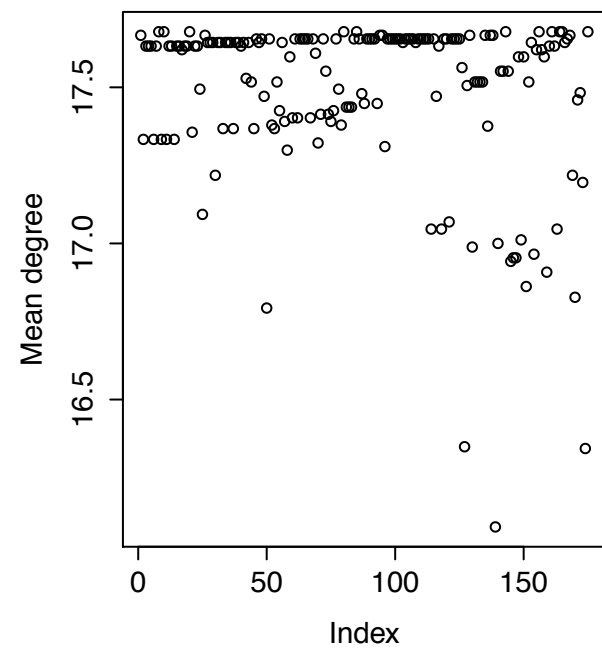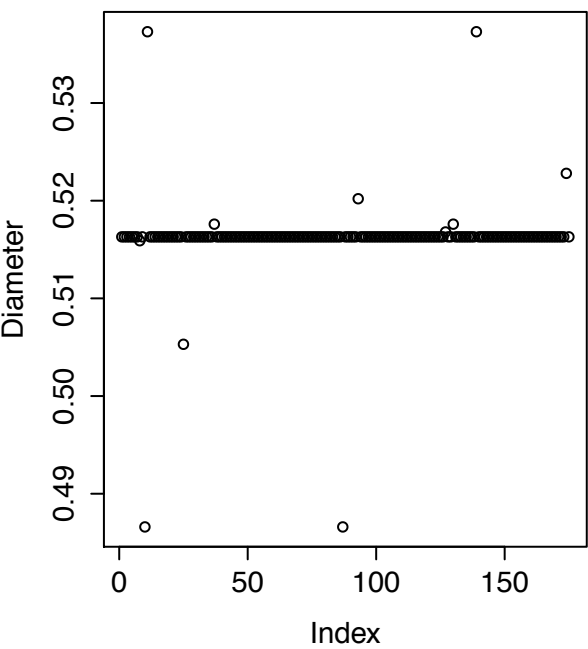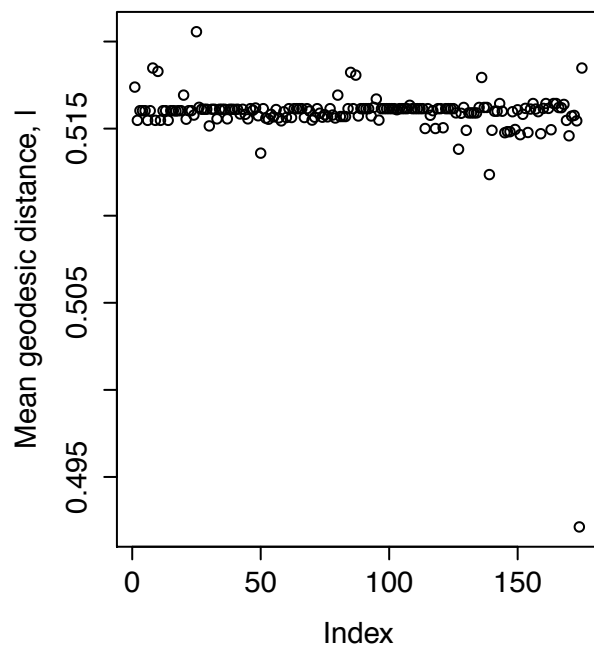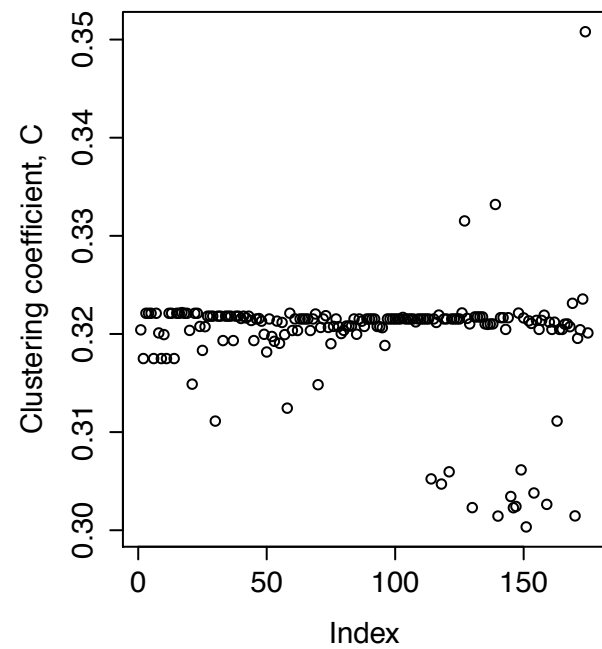

Supplement: mbo001131449sf04.pdf [file mbo001131449sf04.pdf]
